# Supplementary material for: Methyl and Ethyl Ethers of Glycerol as Potential Green Low-Melting Technical Fluids
Source: MDPI journal article supplement (doi:10.3390/molecules28227483), 2023-11-08
Supplement: s1 [file s1]

## Supporting Information

**Manuscript Title:** Methyl and ethyl ethers of glycerol as potential green low-melting technical fluids

**Manuscript Authors:** V.O. Samoilov, V.M. Lavrentev, M.U. Sultanova, D.N. Ramazanov, A.A. Kozhevnikov, G. A. Shandryuk, M.I. Kniazeva, A.L. Maximov

**Authors' affiliation:** Topchiev Institute of Petrochemical Synthesis, Russian Academy of Sciences, Leninsky pr. 29, Moscow 119991, Russia

### Contents:

**Figures S1–S4.** The chromatograms of the synthetic samples of glycerol ethers.

**Figures S5–S11.** The DSC curves for pure ethers and aqueous solutions.

**Table S1.** Density measurements: calibration, raw data and uncertainties.

**Table S2.** Viscosity measurements: calibration, raw data and uncertainties.

### The chromatograms of the synthetic samples of glycerol ethers.

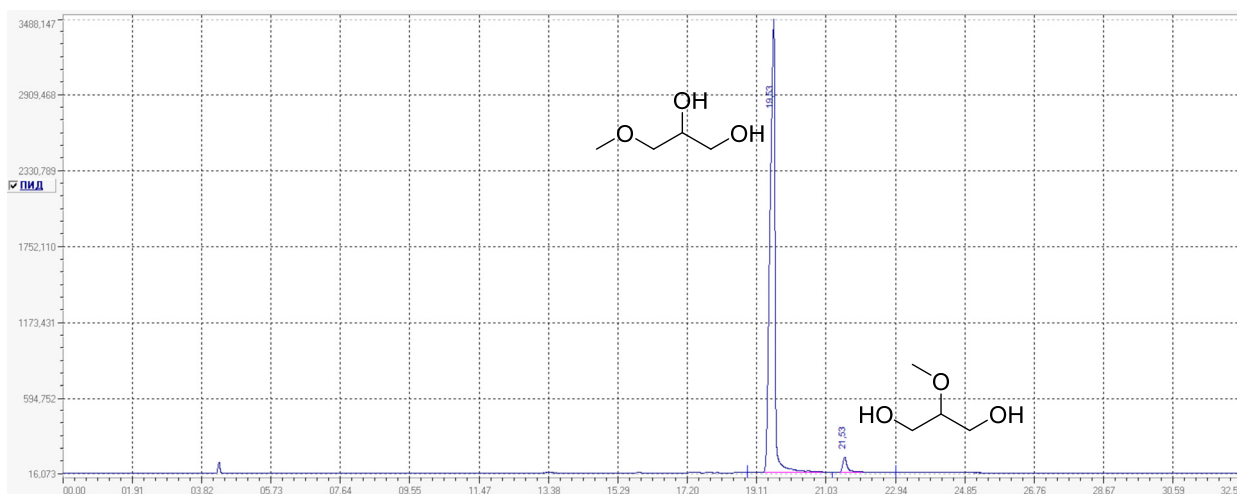

**Figure S1.** The GC-FID chromatogram for GMME sample.

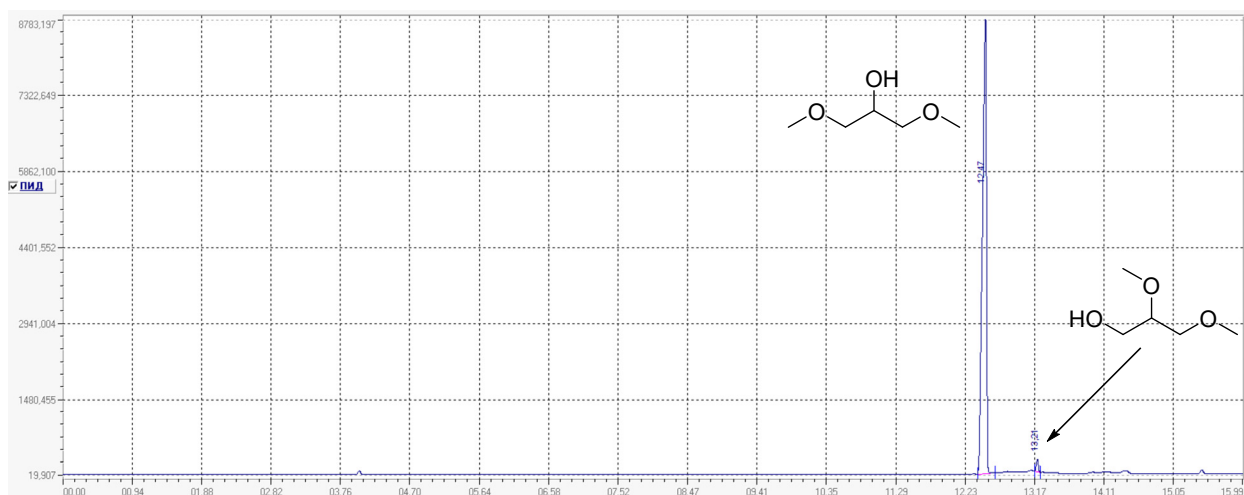

**Figure S2.** The GC-FID chromatogram for GDME sample.

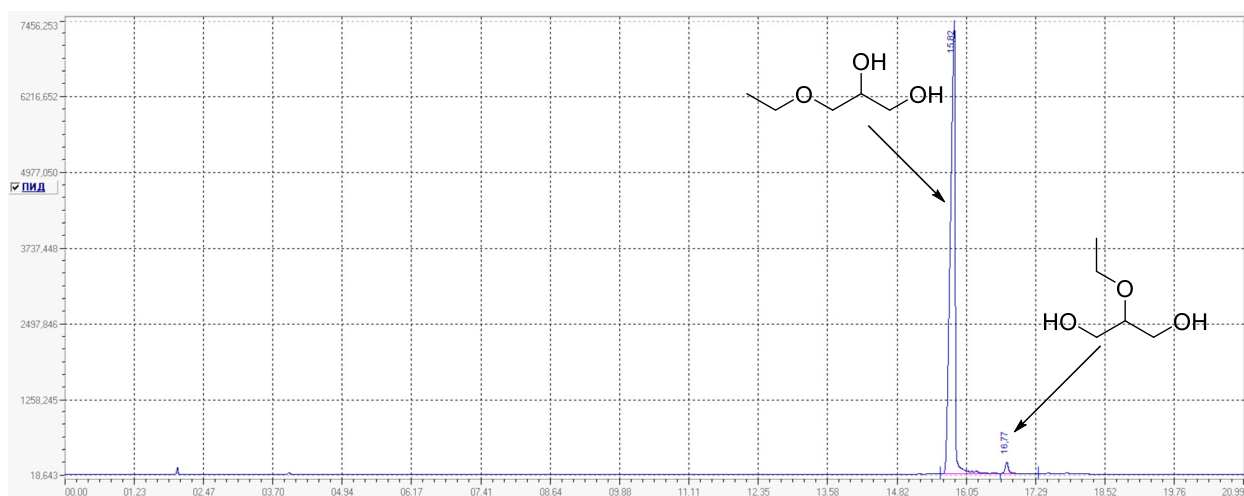

**Figure S3.** The GC-FID chromatogram for GMEE sample.

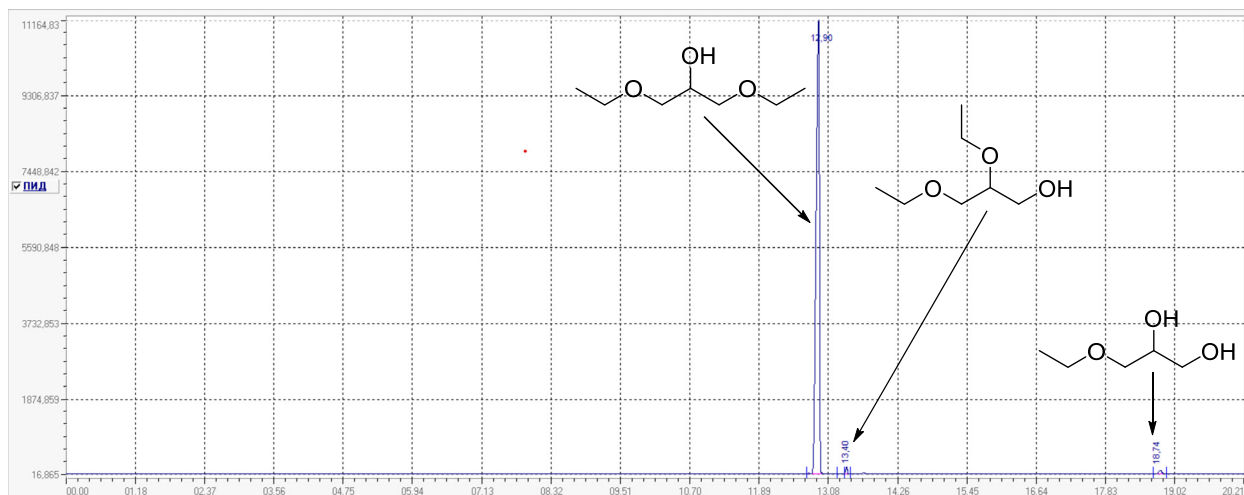

**Figure S4.** The GC-FID chromatogram for GDEE sample.

The DSC curves for pure ethers and aqueous solutions.

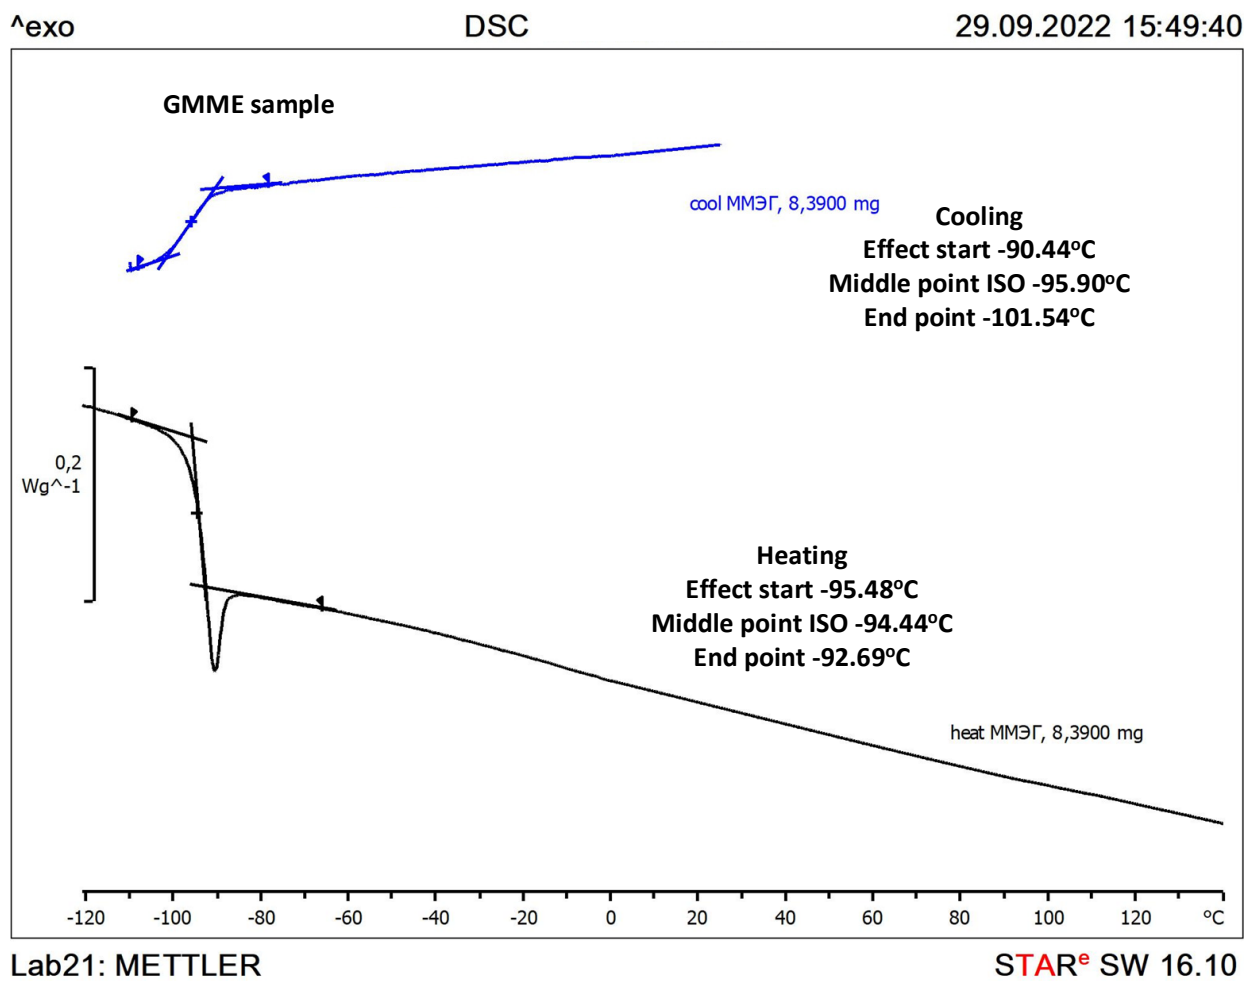

**Figure S5.** The DSC curves for GMME sample (low-temperature phase transition screening).

exo

DSC

25.01.2023 16:40:08

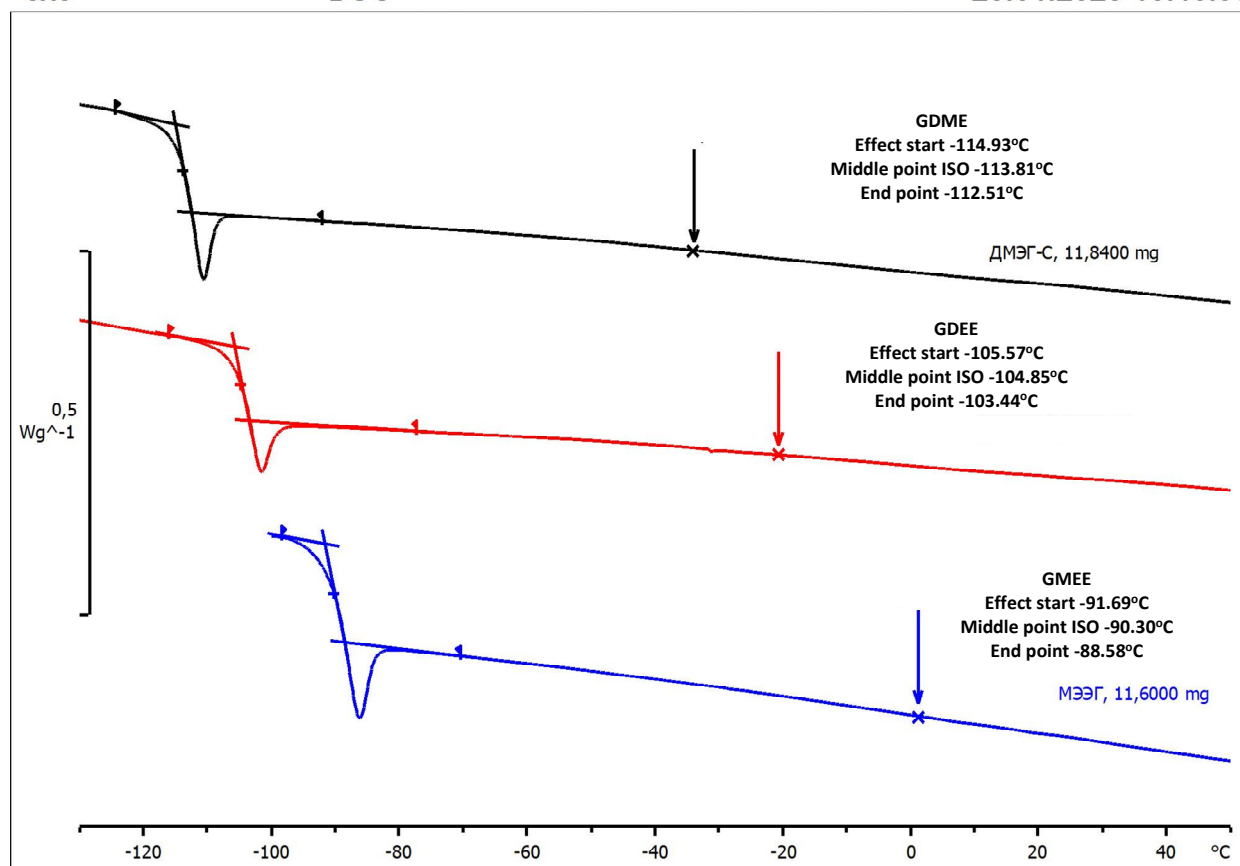

Lab21: METTLER

STAR<sup>®</sup> SW 16.10

**Figure S6.** The DSC curves for GDME, GDEE and GMEE samples (low-temperature phase transition screening).

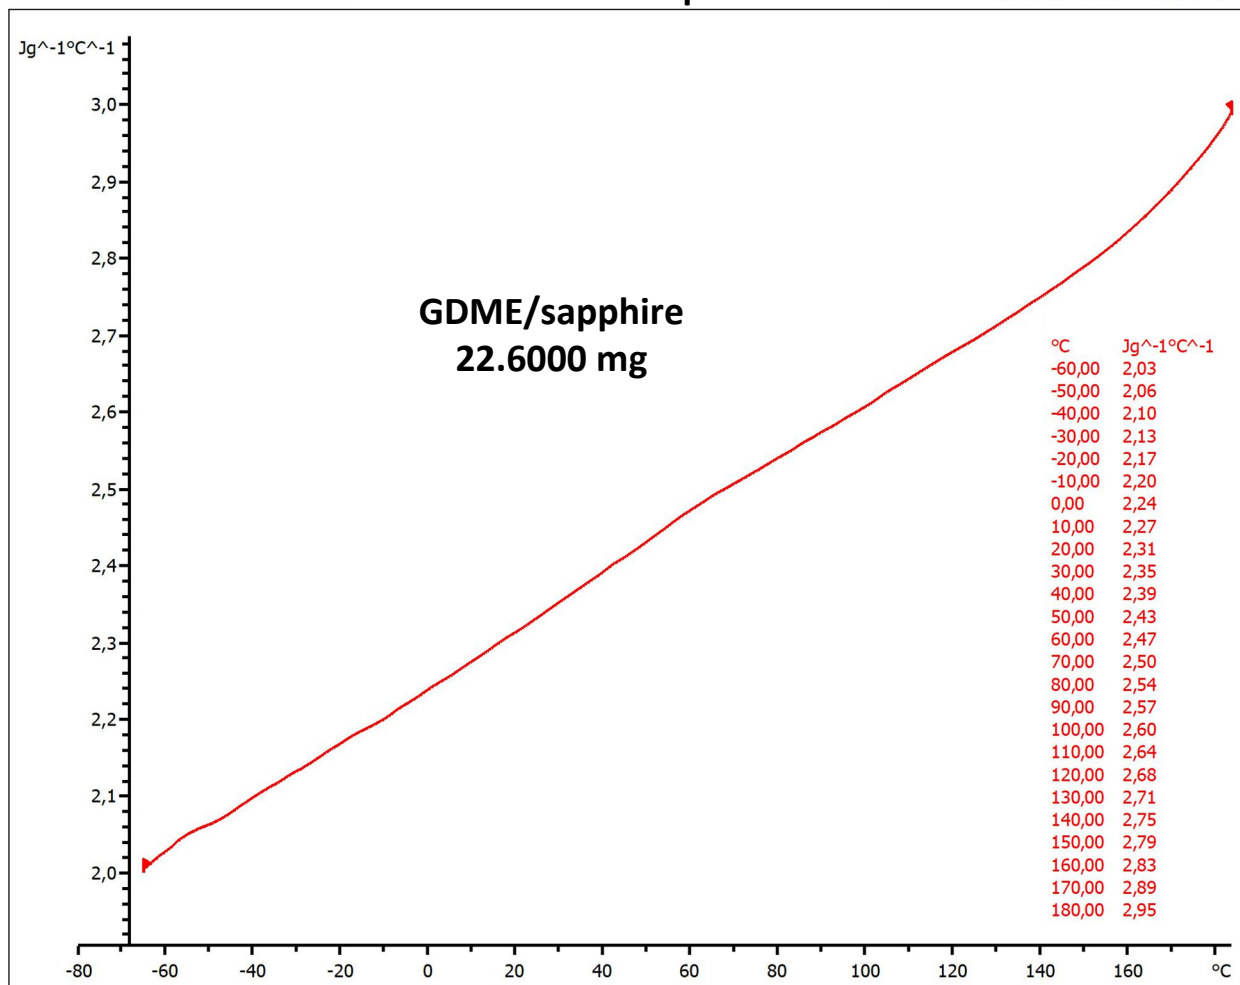

Lab21: METTLER

STAR<sup>e</sup> SW 16.10

**Figure S7.** The DSC curve for GDME sample (specific heat capacity measurement).

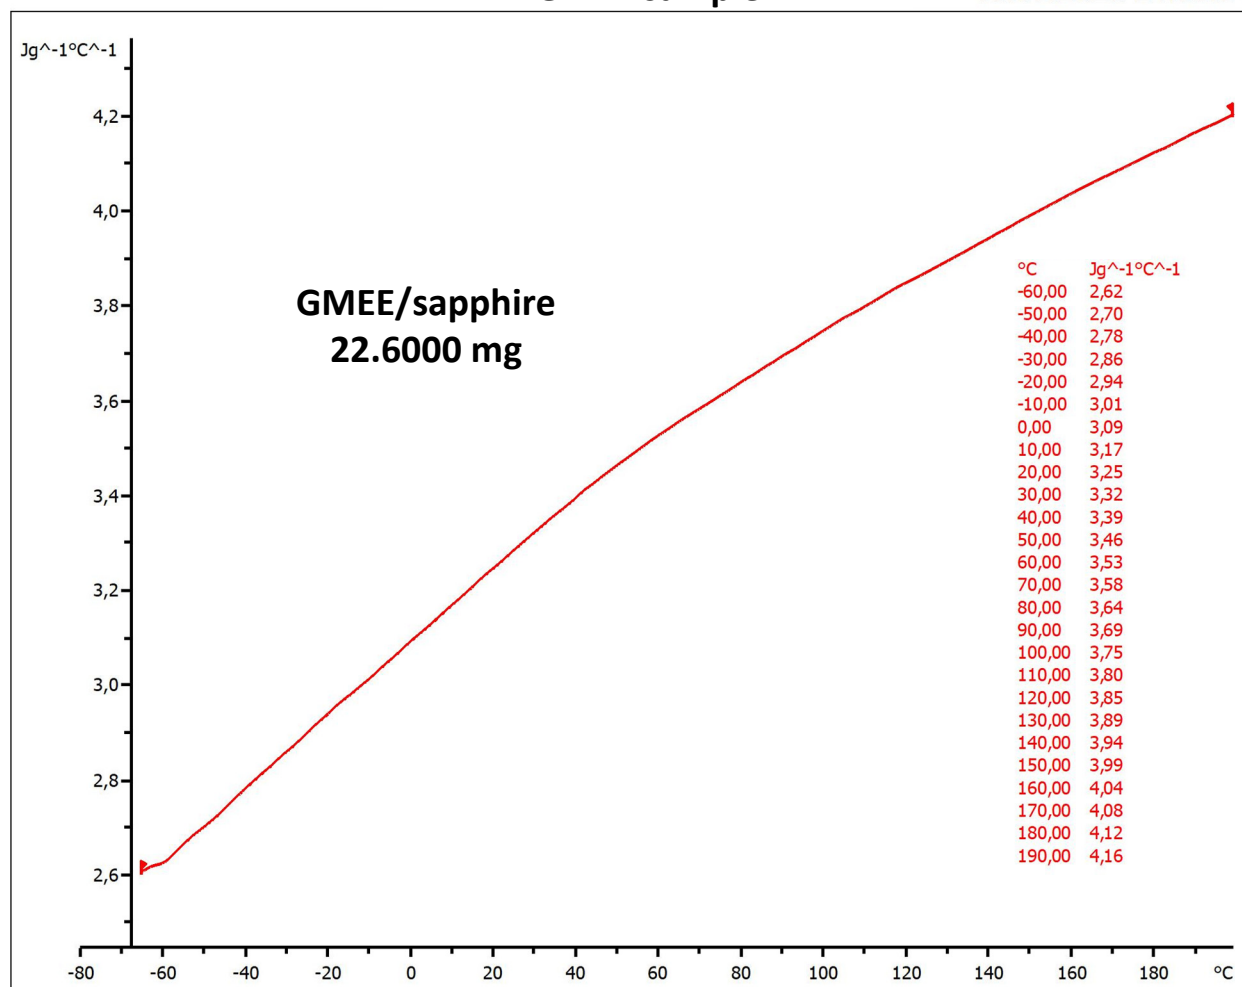

Lab21: METTLER

STAR<sup>e</sup> SW 16.10**Figure S8.** The DSC curve for GMEE sample (specific heat capacity measurement).

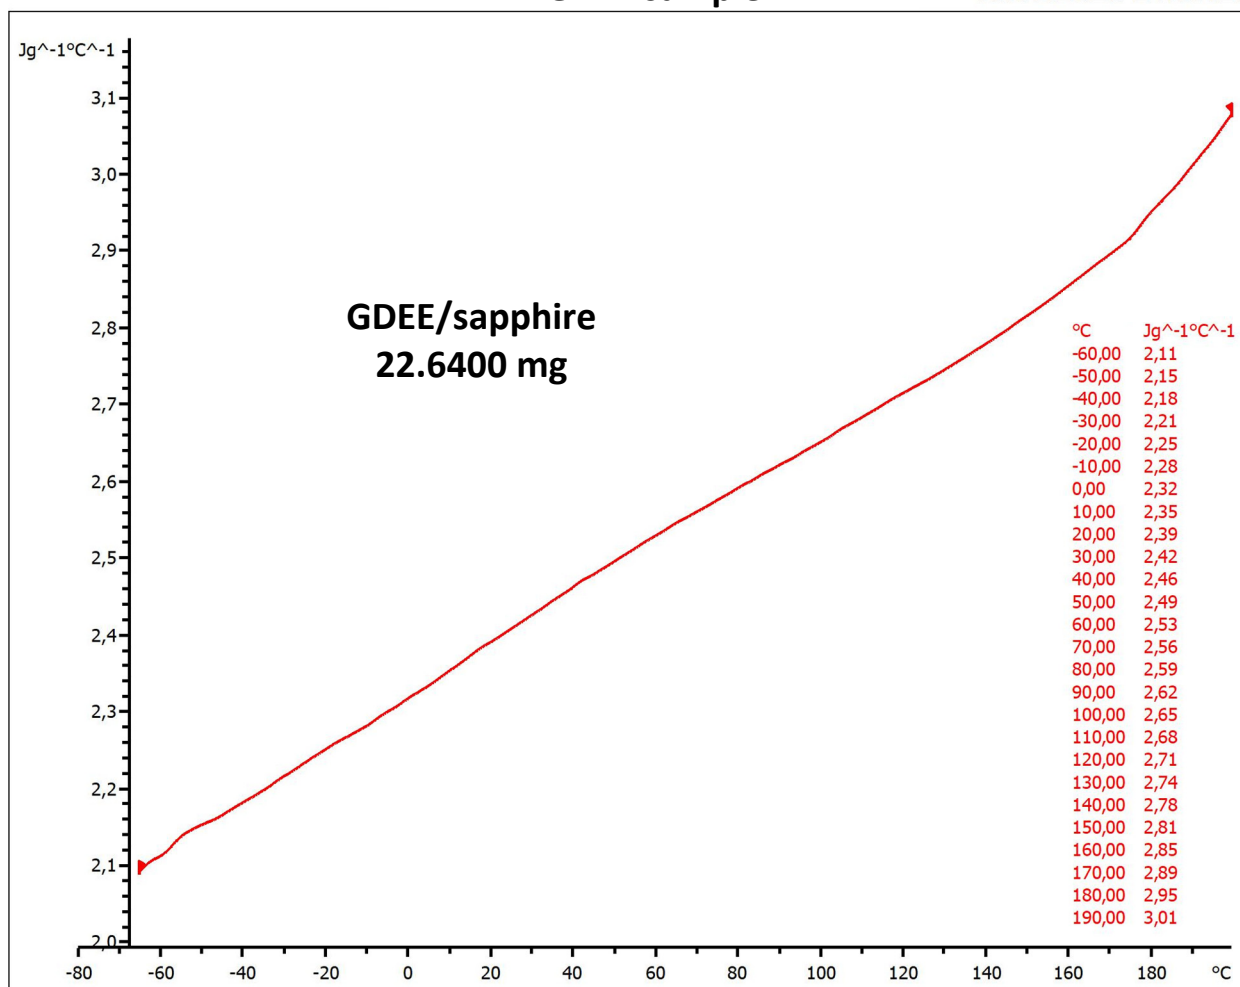

Lab21: METTLER

STAR<sup>e</sup> SW 16.10

**Figure S9.** The DSC curve for GDEE sample (specific heat capacity measurement).

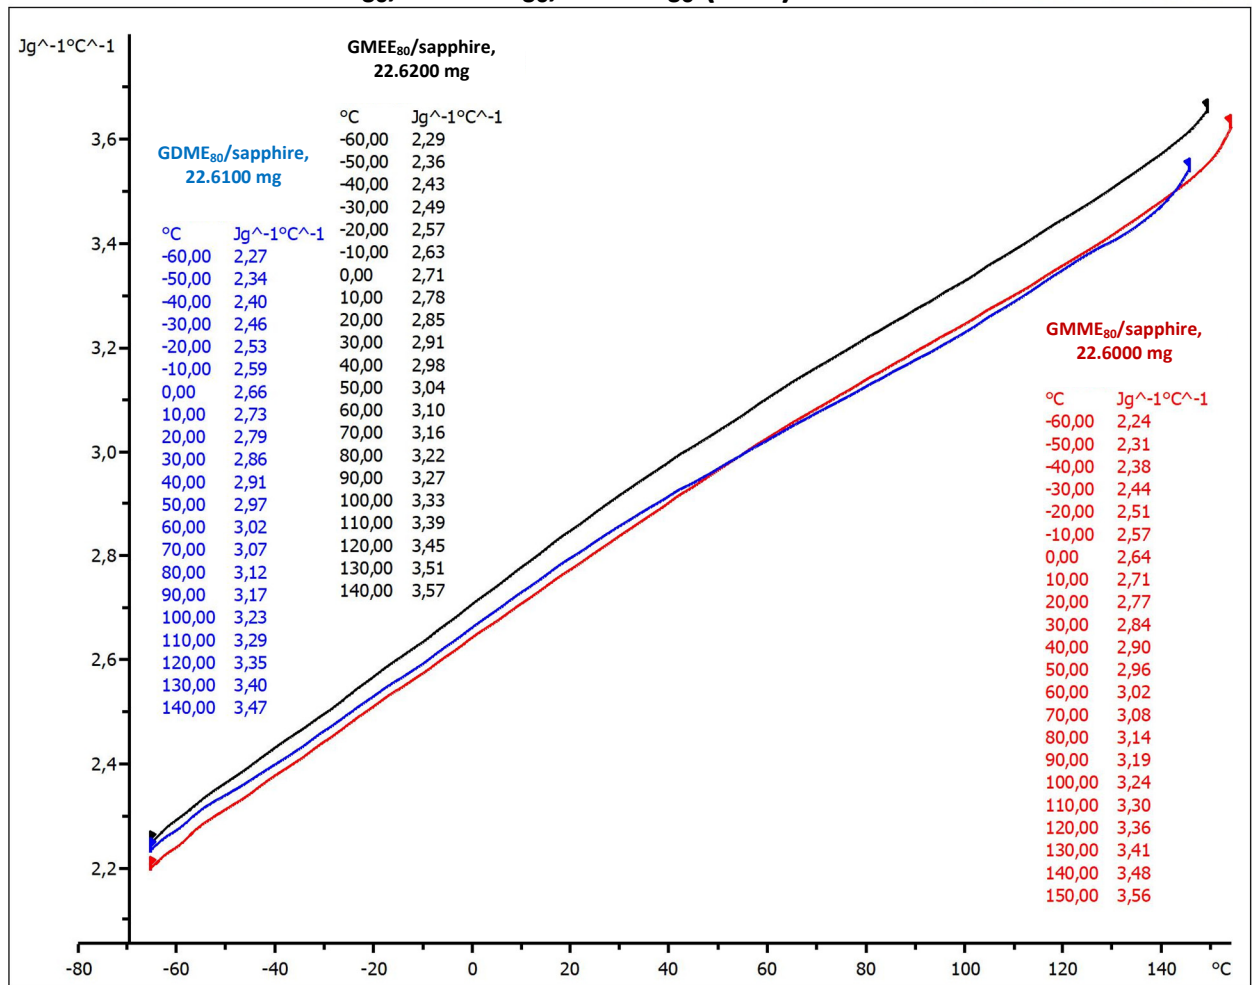

Lab21: METTLER

STAR<sup>e</sup> SW 16.10

**Figure S10.** The DSC curves for GDME<sub>80</sub>, GMME<sub>80</sub> and GMEE<sub>80</sub> samples (specific heat capacity measurement).



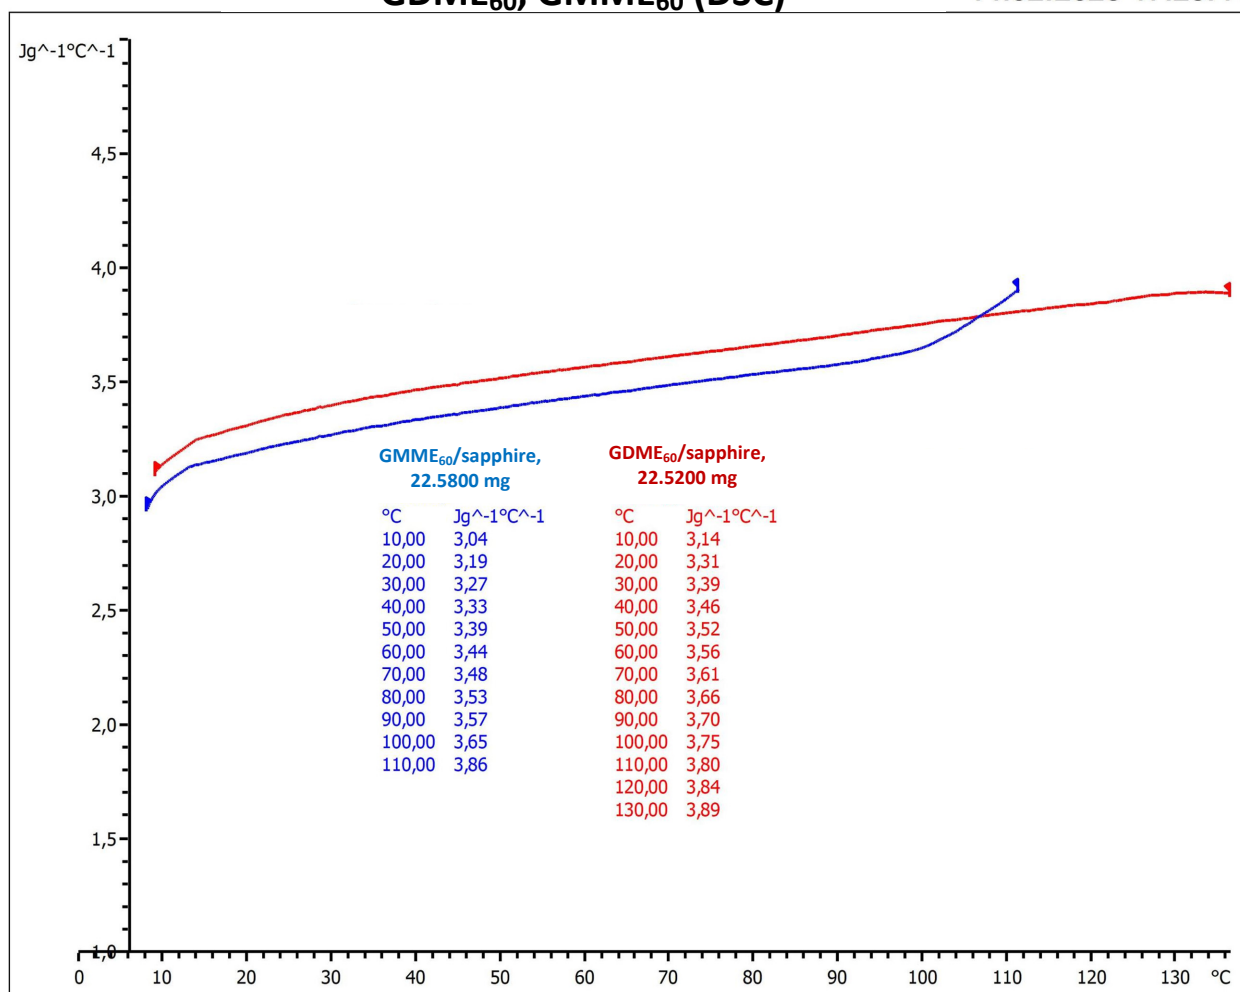

Lab21: METTLER

STAR® SW 16.10

**Figure S11.** The DSC curves for GDME<sub>60</sub> and GMME<sub>60</sub> samples (specific heat capacity measurement).

### Density measurements: calibration, raw data and uncertainties.

#### Density measurements

Apparatus: 'VIP-2MR' vibration densimeter ('Termeks', Tomsk, Russia).

Calibration:

- dry air, T=20°C, individual values 0.0012; 0.0012; 0.0012 g mL<sup>-1</sup>; reference value 0.0012 g mL<sup>-1</sup>.
- distilled water (standard reference sample), T=20°C, individual values 0.9982; 0.9982; 0.9982 g mL<sup>-1</sup>; reference value 0.9982 g mL<sup>-1</sup>.

The raw data for the density of the glycerol ether aqueous solution samples is presented in the Table S1.

**Table S1.** The raw density data for the glycerol ether aqueous solution samples. MV – mean value, relSD – standard deviation expressed in %.

| <b>GMEE, wt %</b>          | <b>20</b> | <b>40</b> | <b>50</b> | <b>60</b> | <b>70</b> | <b>80</b> | <b>100</b> |
|----------------------------|-----------|-----------|-----------|-----------|-----------|-----------|------------|
| density at 10oC,<br>g cm-3 | 1,0373    | 1,0592    | 1,0657    | 1,0735    | 1,0773    | 1,0781    | 1,073      |
|                            | 1,0372    | 1,0593    | 1,0657    | 1,0736    | 1,0773    | 1,0782    | 1,073      |
|                            | 1,0372    | 1,0593    | 1,0658    | 1,0735    | 1,0772    | 1,0782    | 1,073      |
| MV                         | 1,0372    | 1,0593    | 1,0657    | 1,0735    | 1,0773    | 1,0782    | 1,0730     |
| relSD                      | 0,01%     | 0,01%     | 0,01%     | 0,01%     | 0,01%     | 0,01%     | 0,00%      |
| density at 20oC,<br>g cm-3 | 1,0272    | 1,0467    | 1,0544    | 1,0615    | 1,0651    | 1,0658    | 1,0602     |
|                            | 1,0272    | 1,0467    | 1,0543    | 1,0616    | 1,0652    | 1,0659    | 1,0603     |
|                            | 1,0271    | 1,0467    | 1,0543    | 1,0616    | 1,0652    | 1,0658    | 1,0603     |
| MV                         | 1,0272    | 1,0467    | 1,0543    | 1,0616    | 1,0652    | 1,0658    | 1,0603     |
| relSD                      | 0,01%     | 0,00%     | 0,01%     | 0,01%     | 0,01%     | 0,01%     | 0,01%      |
| density at 40oC,<br>g cm-3 | 1,0103    | 1,0268    | 1,0312    | 1,0377    | 1,0396    | 1,0406    | 1,0347     |
|                            | 1,0102    | 1,0269    | 1,0312    | 1,0377    | 1,0396    | 1,0406    | 1,0347     |
|                            | 1,0103    | 1,0269    | 1,0312    | 1,0377    | 1,0396    | 1,0406    | 1,0347     |
| MV                         | 1,0103    | 1,0269    | 1,0312    | 1,0377    | 1,0396    | 1,0406    | 1,0347     |
| relSD                      | 0,01%     | 0,01%     | 0,00%     | 0,00%     | 0,00%     | 0,00%     | 0,00%      |
|                            |           |           |           |           |           |           |            |
| <b>GMME, wt %</b>          | <b>20</b> | <b>40</b> | <b>50</b> | <b>60</b> | <b>70</b> | <b>80</b> | <b>100</b> |
| density at 10oC,<br>g cm-3 | 1,0335    | 1,069     | -         | 1,0983    | -         | 1,1192    | 1,1287     |
|                            | 1,0336    | 1,069     | -         | 1,0983    | -         | 1,1192    | 1,1287     |
|                            | 1,0336    | 1,069     | -         | 1,0983    | -         | 1,1192    | 1,1287     |
| MV                         | 1,0336    | 1,0690    | -         | 1,0983    | -         | 1,1192    | 1,1287     |
| relSD                      | 0,01%     | 0,00%     | -         | 0,00%     | -         | 0,00%     | 0,00%      |
| density at 20oC,<br>g cm-3 | 1,0261    | 1,06      | 1,075     | 1,0882    | 1,0991    | 1,1083    | 1,1165     |
|                            | 1,0262    | 1,0601    | 1,075     | 1,0883    | 1,0992    | 1,1083    | 1,1166     |
|                            | 1,0261    | 1,0601    | 1,075     | 1,0883    | 1,0992    | 1,1082    | 1,1166     |
| MV                         | 1,0261    | 1,0601    | 1,0750    | 1,0883    | 1,0992    | 1,1083    | 1,1166     |
| relSD                      | 0,01%     | 0,01%     | 0,00%     | 0,01%     | 0,01%     | 0,01%     | 0,01%      |
| density at 40oC,<br>g cm-3 | 1,008     | 1,039     | -         | 1,064     | -         | 1,0823    | 1,0913     |
|                            | 1,008     | 1,039     | -         | 1,064     | -         | 1,0823    | 1,0913     |
|                            | 1,008     | 1,039     | -         | 1,064     | -         | 1,0823    | 1,0913     |
| MV                         | 1,0080    | 1,0390    | -         | 1,0640    | -         | 1,0823    | 1,0913     |
| relSD                      | 0,00%     | 0,00%     | -         | 0,00%     | -         | 0,00%     | 0,00%      |
|                            |           |           |           |           |           |           |            |
| <b>GDEE, wt %</b>          | <b>20</b> | <b>40</b> | <b>50</b> | <b>60</b> | <b>70</b> | <b>80</b> | <b>100</b> |
| density at 10oC,<br>g cm-3 | 1,0162    | 1,0217    | 1,0132    | 0,9938    | 0,9635    | 1,0162    | 1,0217     |
|                            | 1,0162    | 1,0217    | 1,0132    | 0,9938    | 0,9636    | 1,0162    | 1,0217     |
|                            | 1,0162    | 1,0217    | 1,0132    | 0,9938    | 0,9636    | 1,0162    | 1,0217     |
| MV                         | 1,0162    | 1,0217    | 1,0132    | 0,9938    | 0,9636    | 1,0162    | 1,0217     |
| relSD                      | 0,00%     | 0,00%     | 0,00%     | 0,00%     | 0,01%     | 0,00%     | 0,00%      |
| density at 20oC,<br>g cm-3 | 1,0075    | 1,0099    | 1,0004    | 0,9815    | 0,9503    | 1,0075    | 1,0099     |
|                            | 1,0074    | 1,01      | 1,0005    | 0,9816    | 0,9503    | 1,0074    | 1,01       |

|                            |           |           |           |           |           |           |            |
|----------------------------|-----------|-----------|-----------|-----------|-----------|-----------|------------|
|                            | 1,0074    | 1,01      | 1,0005    | 0,9816    | 0,9503    | 1,0074    | 1,01       |
| MV                         | 1,0074    | 1,0100    | 1,0005    | 0,9816    | 0,9503    | 1,0074    | 1,0100     |
| relSD                      | 0,01%     | 0,01%     | 0,01%     | 0,01%     | 0,00%     | 0,01%     | 0,01%      |
| density at 40oC,<br>g cm-3 | 0,9889    | 0,9857    | 0,9737    | 0,9545    | 0,9226    | 0,9889    | 0,9857     |
|                            | 0,9889    | 0,9857    | 0,9737    | 0,9545    | 0,9226    | 0,9889    | 0,9857     |
|                            | 0,9889    | 0,9857    | 0,9737    | 0,9545    | 0,9226    | 0,9889    | 0,9857     |
| MV                         | 0,9889    | 0,9857    | 0,9737    | 0,9545    | 0,9226    | 0,9889    | 0,9857     |
| relSD                      | 0,00%     | 0,00%     | 0,00%     | 0,00%     | 0,00%     | 0,00%     | 0,00%      |
|                            |           |           |           |           |           |           |            |
| <b>GDME, wt %</b>          | <b>20</b> | <b>40</b> | <b>50</b> | <b>60</b> | <b>70</b> | <b>80</b> | <b>100</b> |
| density at 10oC,<br>g cm-3 | 1,0235    | 1,043     | -         | 1,0543    | -         | 1,0523    | 1,036      |
|                            | 1,0235    | 1,043     | -         | 1,0543    | -         | 1,0522    | 1,0359     |
|                            | 1,0235    | 1,0431    | -         | 1,0543    | -         | 1,0522    | 1,0359     |
| MV                         | 1,0235    | 1,0430    | -         | 1,0543    | -         | 1,0522    | 1,0359     |
| relSD                      | 0,00%     | 0,01%     | -         | 0,00%     | -         | 0,01%     | 0,01%      |
| density at 20oC,<br>g cm-3 | 1,0161    | 1,0329    | 1,0394    | 1,0426    | 1,0423    | 1,0393    | 1,0218     |
|                            | 1,0161    | 1,0329    | 1,0394    | 1,0426    | 1,0424    | 1,0393    | 1,0218     |
|                            | 1,0161    | 1,033     | 1,0393    | 1,0426    | 1,0424    | 1,0393    | 1,0218     |
| MV                         | 1,0161    | 1,0329    | 1,0394    | 1,0426    | 1,0424    | 1,0393    | 1,0218     |
| relSD                      | 0,00%     | 0,01%     | 0,01%     | 0,00%     | 0,01%     | 0,00%     | 0,00%      |
| density at 40oC,<br>g cm-3 | 0,9978    | 1,0104    | -         | 1,0172    | -         | 1,0133    | 0,9971     |
|                            | 0,9978    | 1,0105    | -         | 1,0173    | -         | 1,0132    | 0,9971     |
|                            | 0,9978    | 1,0105    | -         | 1,0173    | -         | 1,0132    | 0,9971     |
| MV                         | 0,9978    | 1,0105    | -         | 1,0173    | -         | 1,0132    | 0,9971     |
| relSD                      | 0,00%     | 0,01%     | -         | 0,01%     | -         | 0,01%     | 0,00%      |

## Viscosity measurements: calibration, raw data and uncertainties.

### Kinematic viscosity measurements

**Apparatus:** ‘VPZh-4’ glass capillary viscometer (‘Ekros’, Moscow, Russia) with a metrological certificate, KRIO-VIS-T-06-01 bath thermostate (‘Termeks’, Tomsk, Russia).

**Calibration:** for an additional control of the accuracy of the measurements, viscosities of lab-prepared distilled water were measured.

Measured values: 1.004 mm<sup>2</sup> s<sup>-1</sup> at 20°C, 0.658 mm<sup>2</sup> s<sup>-1</sup> at 40°C, 0.365 mm<sup>2</sup> s<sup>-1</sup> at 80°C.

Reference values: 1.0034 mm<sup>2</sup> s<sup>-1</sup> at 20°C, 0.6579 mm<sup>2</sup> s<sup>-1</sup> at 40°C, 0.3643 mm<sup>2</sup> s<sup>-1</sup> at 80°C.

The reference values were taken from Anton Paar open source (<https://wiki.anton-paar.com/en/water/>).

The raw data for the viscosity of the glycerol ether aqueous solution samples is presented in the Table S2.

**Table S2.** The viscosity raw data for the glycerol ether aqueous solution samples.

| GMME, wt %                                       | 10     | 20     | 40     | 60    | 80     | 100    |
|--------------------------------------------------|--------|--------|--------|-------|--------|--------|
| Measurement temperature 20°C                     |        |        |        |       |        |        |
| measured values, mm <sup>2</sup> s <sup>-1</sup> | -      | 1,84   | 3,64   | 8,18  | 19,78  | 50,50  |
|                                                  | -      | 1,84   | 3,64   | 8,17  | 19,79  | 50,60  |
|                                                  | -      | 1,85   | 3,67   | 8,17  | 19,87  | 50,56  |
| mean value                                       | -      | 1,84   | 3,65   | 8,17  | 19,81  | 50,55  |
| standard deviation (absolute)                    | -      | 0,006  | 0,017  | 0,006 | 0,049  | 0,050  |
| standard deviation (relative to mean value)      | -      | 0,58%  | 0,47%  | 0,07% | 0,25%  | 0,10%  |
| Measurement temperature 40°C                     |        |        |        |       |        |        |
| measured values, mm <sup>2</sup> s <sup>-1</sup> | 17,66  | 1,12   | 1,99   | 3,81  | 8,00   | 470,72 |
|                                                  | 17,42  | 1,12   | 2,00   | 3,84  | 8,00   | 471,63 |
|                                                  | 17,38  | 1,12   | 1,98   | 3,83  | 8,00   | 471,25 |
| mean value                                       | 17,49  | 1,12   | 1,99   | 3,83  | 8,00   | 471,20 |
| standard deviation (absolute)                    | 0,151  | 0,000  | 0,010  | 0,015 | 0,000  | 0,457  |
| standard deviation (relative to mean value)      | 0,87%  | 0,00%  | 0,50%  | 0,40% | 0,00%  | 0,10%  |
| Measurement temperature 80°C                     |        |        |        |       |        |        |
| measured values, mm <sup>2</sup> s <sup>-1</sup> | 4,11   | 0,56   | 0,86   | 1,4   | 2,38   | 332,94 |
|                                                  | 4,11   | 0,56   | 0,86   | 1,4   | 2,38   | 332,72 |
|                                                  | 4,13   | 0,56   | 0,86   | 1,4   | 2,38   | 333,84 |
| mean value                                       | 4,12   | 0,56   | 0,86   | 1,40  | 2,38   | 333,17 |
| standard deviation (absolute)                    | 0,01   | 0,00   | 0,00   | 0,00  | 0,00   | 0,59   |
| standard deviation (relative to mean value)      | 0,00   | 0,00   | 0,00   | 0,00  | 0,00   | 0,00   |
| Measurement temperature -20°C                    |        |        |        |       |        |        |
| measured values, mm <sup>2</sup> s <sup>-1</sup> | -      | -      | -      | 98,21 | 365,84 | 533,25 |
|                                                  | -      | -      | -      | 98,23 | 365,07 | 533,28 |
|                                                  | -      | -      | -      | 98,22 | -      | -      |
| mean value                                       | -      | -      | -      | 98,22 | 365,46 | 533,27 |
| standard deviation (absolute)                    | -      | -      | -      | 0,010 | 0,544  | 0,021  |
| standard deviation (relative to mean value)      | -      | -      | -      | 0,01% | 0,15%  | 0,00%  |
| GMEE, wt %                                       | 20     | 40     | 60     | 80    | 100    |        |
| Measurement temperature 20°C                     |        |        |        |       |        |        |
| measured values, mm <sup>2</sup> s <sup>-1</sup> | 393,28 | 361,41 | 313,78 | 21,38 | 49,00  |        |
|                                                  | 393,91 | 361,63 | 316,28 | 21,31 | 49,00  |        |

|                                                     |           |           |           |           |            |
|-----------------------------------------------------|-----------|-----------|-----------|-----------|------------|
|                                                     | -         | -         | 312,88    | 21,36     | 49,00      |
| mean value                                          | 393,60    | 361,52    | 314,31    | 21,35     | 49,00      |
| standard deviation<br>(absolute)                    | 0,445     | 0,156     | 1,762     | 0,036     | 0,000      |
| standard deviation<br>(relative to mean<br>value)   | 0,11%     | 0,04%     | 0,56%     | 0,17%     | 0,00%      |
| <b>Measurement temperature 40°C</b>                 |           |           |           |           |            |
| measured values, mm <sup>2</sup><br>s <sup>-1</sup> | 370,56    | 434,46    | 349,00    | 8,5       | 17,15      |
|                                                     | 370,57    | 435,31    | 349,03    | 8,5       | 17,15      |
|                                                     | 369,97    | 433,25    | 349,50    | 8,49      | 17,13      |
| mean value                                          | 370,37    | 434,34    | 349,18    | 8,50      | 17,14      |
| standard deviation<br>(absolute)                    | 0,344     | 1,035     | 0,280     | 0,006     | 0,012      |
| standard deviation<br>(relative to mean<br>value)   | 0,09%     | 0,24%     | 0,08%     | 0,07%     | 0,07%      |
| <b>Measurement temperature 80°C</b>                 |           |           |           |           |            |
| measured values, mm <sup>2</sup><br>s <sup>-1</sup> | 160,28    | 290,94    | 290,68    | 2,49      | 4,04       |
|                                                     | 160,63    | 290,82    | 290,59    | 2,49      | 4,04       |
|                                                     | -         | 289,94    | -         | 2,5       | 4,04       |
| mean value                                          | 160,46    | 290,57    | 290,64    | 2,49      | 4,04       |
| standard deviation<br>(absolute)                    | 0,247     | 0,546     | 0,064     | 0,006     | 0,000      |
| standard deviation<br>(relative to mean<br>value)   | 0,15%     | 0,19%     | 0,02%     | 0,23%     | 0,00%      |
| <b>Measurement temperature -20°C</b>                |           |           |           |           |            |
| measured values, mm <sup>2</sup><br>s <sup>-1</sup> | -         | -         | 429,66    | 402,19    | 501,78     |
|                                                     | -         | -         | 429,25    | 399,69    | 502,28     |
|                                                     | -         | -         | -         | 403,56    | -          |
| mean value                                          | -         | -         | 429,46    | 401,81    | 502,03     |
| standard deviation<br>(absolute)                    | -         | -         | 0,290     | 1,962     | 0,354      |
| standard deviation<br>(relative to mean<br>value)   | -         | -         | 0,07%     | 0,49%     | 0,07%      |
| <b>GDME, wt %</b>                                   | <b>20</b> | <b>40</b> | <b>60</b> | <b>80</b> | <b>100</b> |
| <b>Measurement temperature 20°C</b>                 |           |           |           |           |            |
| measured values, mm <sup>2</sup><br>s <sup>-1</sup> | 1,92      | 3,43      | 5,69      | 4,98      | 4,15       |
|                                                     | 1,91      | 3,48      | 5,65      | 4,99      | 4,15       |
|                                                     | 1,91      | 3,45      | 5,65      | 4,96      | 4,15       |
| mean value                                          | 1,91      | 3,45      | 5,66      | 4,98      | 4,15       |

|                                                     |           |           |           |           |            |
|-----------------------------------------------------|-----------|-----------|-----------|-----------|------------|
| standard deviation<br>(absolute)                    | 0,006     | 0,025     | 0,023     | 0,015     | 0,000      |
| standard deviation<br>(relative to mean<br>value)   | 0,30%     | 0,73%     | 0,41%     | 0,31%     | 0,00%      |
| <b>Measurement temperature 40°C</b>                 |           |           |           |           |            |
| measured values, mm <sup>2</sup><br>s <sup>-1</sup> | 1,12      | 1,86      | 2,74      | 3,13      | 2,41       |
|                                                     | 1,12      | 1,86      | 2,79      | 3,15      | 2,41       |
|                                                     | 1,12      | 1,86      | 2,78      | 3,13      | 2,42       |
| mean value                                          | 1,12      | 1,86      | 2,77      | 3,14      | 2,41       |
| standard deviation<br>(absolute)                    | 0,000     | 0,000     | 0,026     | 0,012     | 0,006      |
| standard deviation<br>(relative to mean<br>value)   | 0,00%     | 0,00%     | 0,96%     | 0,37%     | 0,24%      |
| <b>Measurement temperature 80°C</b>                 |           |           |           |           |            |
| measured values, mm <sup>2</sup><br>s <sup>-1</sup> | 0,55      | 0,8       | 1,1       | 1,28      | 1,09       |
|                                                     | 0,55      | 0,8       | 1,09      | 1,25      | 1,08       |
|                                                     | 0,55      | 0,8       | 1,08      | 1,26      | 1,09       |
| mean value                                          | 0,55      | 0,80      | 1,09      | 1,26      | 1,09       |
| standard deviation<br>(absolute)                    | 0,000     | 0,000     | 0,010     | 0,015     | 0,006      |
| standard deviation<br>(relative to mean<br>value)   | 0,00%     | 0,00%     | 0,92%     | 1,21%     | 0,53%      |
| <b>Measurement temperature -20°C</b>                |           |           |           |           |            |
| measured values, mm <sup>2</sup><br>s <sup>-1</sup> | -         | -         | 55,28     | 59,94     | 26,41      |
|                                                     | -         | -         | 55,25     | 59,99     | 26,44      |
|                                                     | -         | -         | 54,96     | 60,06     | 26,4       |
| mean value                                          | -         | -         | 55,16     | 60,00     | 26,42      |
| standard deviation<br>(absolute)                    | -         | -         | 0,177     | 0,060     | 0,021      |
| standard deviation<br>(relative to mean<br>value)   | -         | -         | 0,32%     | 0,10%     | 0,08%      |
| <b>GDEE, wt %</b>                                   | <b>20</b> | <b>40</b> | <b>60</b> | <b>80</b> | <b>100</b> |
| <b>Measurement temperature 20°C</b>                 |           |           |           |           |            |
| measured values, mm <sup>2</sup> s <sup>-1</sup>    | 719,81    | 749,25    | 6,52      | 7,02      | 4,16       |
|                                                     | 722,19    | 746,37    | 6,53      | 7         | 4,16       |
|                                                     | 725,66    | -         | 6,53      | 7,01      | 4,15       |
| mean value                                          | 722,55    | 747,81    | 6,53      | 7,01      | 4,16       |
| standard deviation<br>(absolute)                    | 2,942     | 2,036     | 0,006     | 0,010     | 0,006      |

|                                                  |        |        |       |       |       |
|--------------------------------------------------|--------|--------|-------|-------|-------|
| standard deviation<br>(relative to mean value)   | 0,41%  | 0,27%  | 0,09% | 0,14% | 0,14% |
| <b>Measurement temperature 40°C</b>              |        |        |       |       |       |
| measured values, mm <sup>2</sup> s <sup>-1</sup> | 222,63 | 430,56 | 3,17  | 3,44  | 2,34  |
|                                                  | 222,32 | 430,81 | 3,17  | 3,45  | 2,34  |
|                                                  | -      | -      | 3,17  | 3,44  | 2,34  |
| mean value                                       | 222,48 | 430,69 | 3,17  | 3,44  | 2,34  |
| standard deviation<br>(absolute)                 | 0,219  | 0,177  | 0,000 | 0,006 | 0,000 |
| standard deviation<br>(relative to mean value)   | 0,10%  | 0,04%  | 0,00% | 0,17% | 0,00% |
| <b>Measurement temperature 80°C</b>              |        |        |       |       |       |
| measured values, mm <sup>2</sup> s <sup>-1</sup> | 168,88 | 290,19 | 1,23  | 1,32  | 1,07  |
|                                                  | 168,69 | 289,88 | 1,23  | 1,33  | 1,07  |
|                                                  | -      | 292,34 | 1,23  | 1,33  | 1,07  |
| mean value                                       | 168,79 | 290,80 | 1,23  | 1,33  | 1,07  |
| standard deviation<br>(absolute)                 | 0,134  | 1,340  | 0,000 | 0,006 | 0,000 |
| standard deviation<br>(relative to mean value)   | 0,08%  | 0,46%  | 0,00% | 0,44% | 0,00% |
| <b>Measurement temperature -20°C</b>             |        |        |       |       |       |
| measured values, mm <sup>2</sup> s <sup>-1</sup> | -      | -      | 81,63 | 72,67 | 28,91 |
|                                                  | -      | -      | 81,62 | 72,7  | 28,91 |
|                                                  | -      | -      | 81,57 | 72,73 | 28,89 |
| mean value                                       | -      | -      | 81,61 | 72,70 | 28,90 |
| standard deviation<br>(absolute)                 | -      | -      | 0,032 | 0,030 | 0,012 |
| standard deviation<br>(relative to mean value)   | -      | -      | 0,04% | 0,04% | 0,04% |
